# Supplementary material for: Design, Synthesis, and Biological Evaluation of N14-Amino Acid-Substituted Tetrandrine Derivatives as Potential Antitumor Agents against Human Colorectal Cancer
Source: MDPI journal article supplement (doi:10.3390/molecules27134040), 2022-06-23
Supplement: s1 [file s1]

## Supporting Information

# Design, Synthesis, and Biological Evaluation of N14-Amino Acid-Substituted Tetrandrine Derivatives as Potential Antitumor Agents against Human Colorectal Cancer

Yu-Chan Wang, Rong-Hong Zhang, Sheng-Cao Hu, Hong Zhang, Dan Yang, Wen-Li  
Zhang, Yong-Long Zhao, Dong-Bing Cui, Yong-Jun Li, Wei-Dong Pan, Shang-Gao  
Liao, Meng Zhou

## Table of Content

### 1. Supporting Figures

Figure S1.....2

Figure S2.....2

2.  $^1\text{H}$  and  $^{13}\text{C}$  NMR spectra of compounds.....3

3. IR spectra of compounds.....14

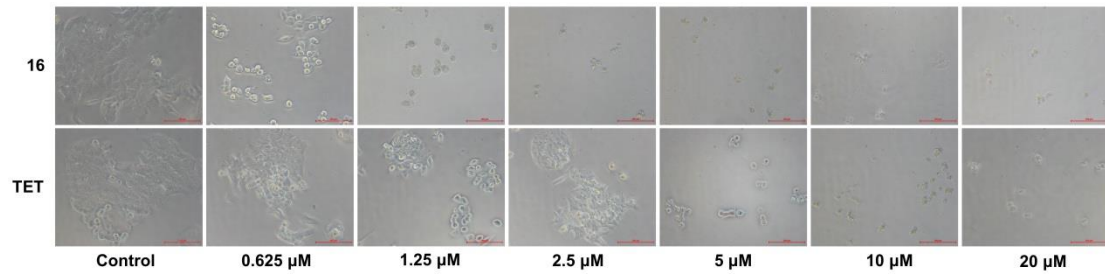

**Figure S1.** Morphology of HCT-15 cells after adding different concentrations of **16**, and tetrandrine (TET).

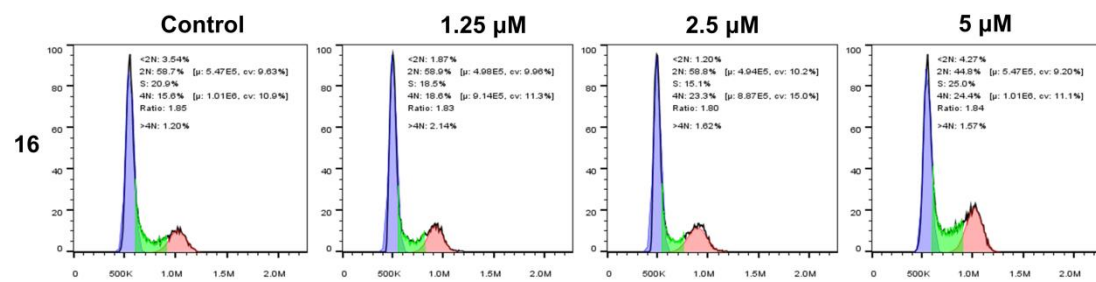

**Figure S2.** Cell cycle analysis of HCT-15 cells treated with **16** (1.25, 2.5, 5  $\mu\text{M}$ ) for 24 h by flow cytometry assay.

# <sup>1</sup>H and <sup>13</sup>C NMR spectra of compounds

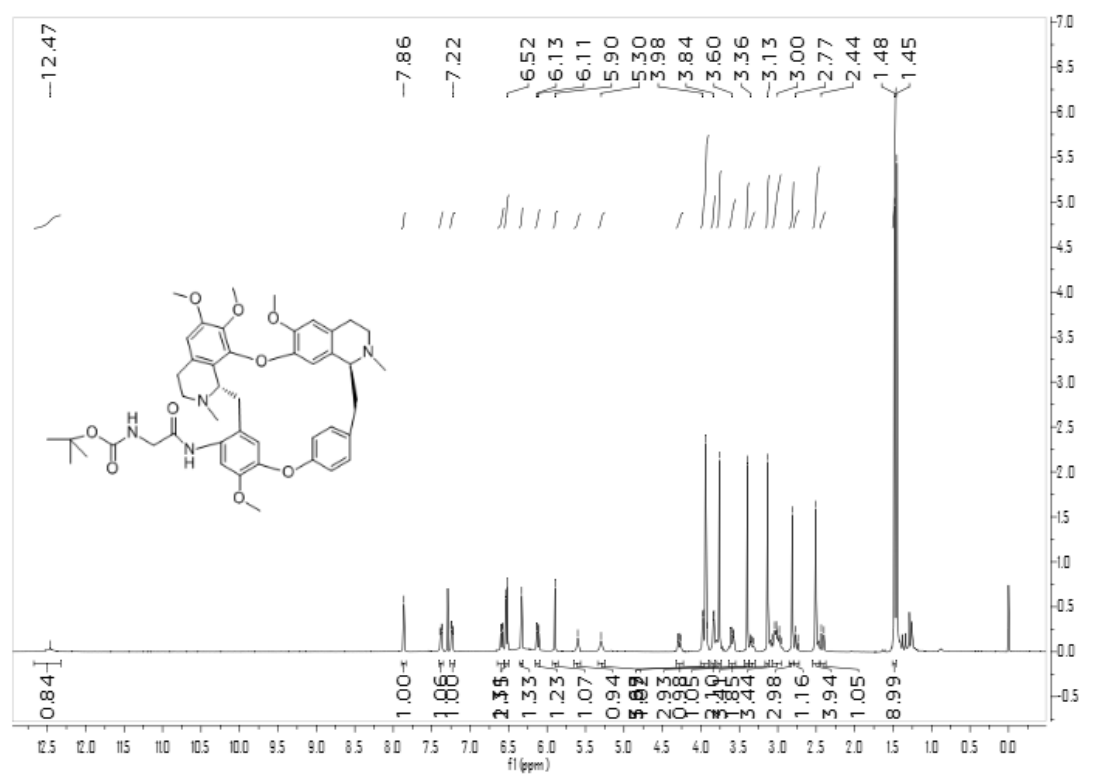

<sup>1</sup>H NMR spectrum of **3**

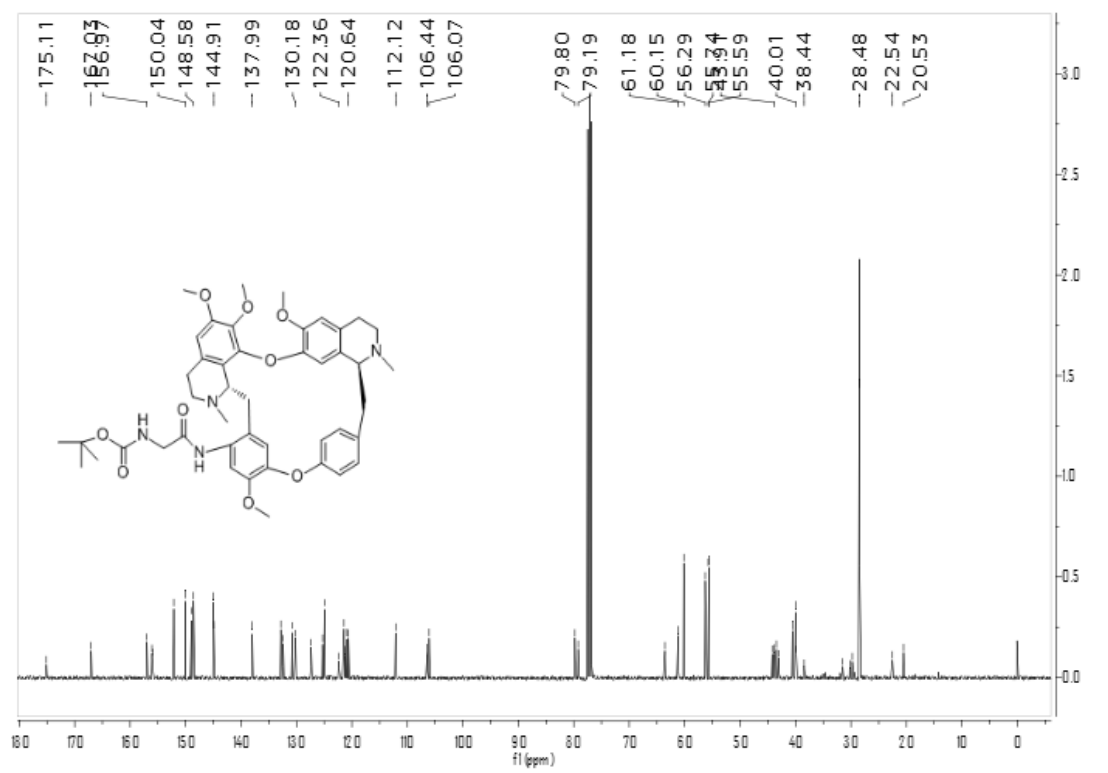

<sup>13</sup>C NMR spectrum of **3**

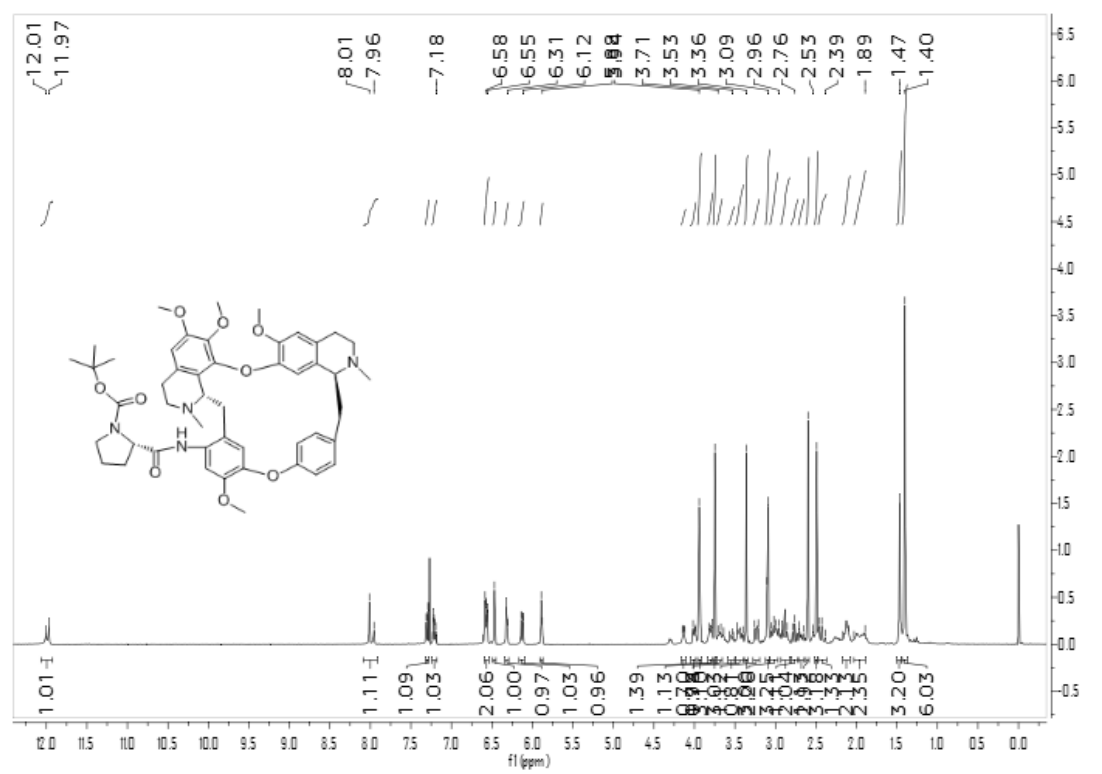

<sup>1</sup>H NMR spectrum of 7

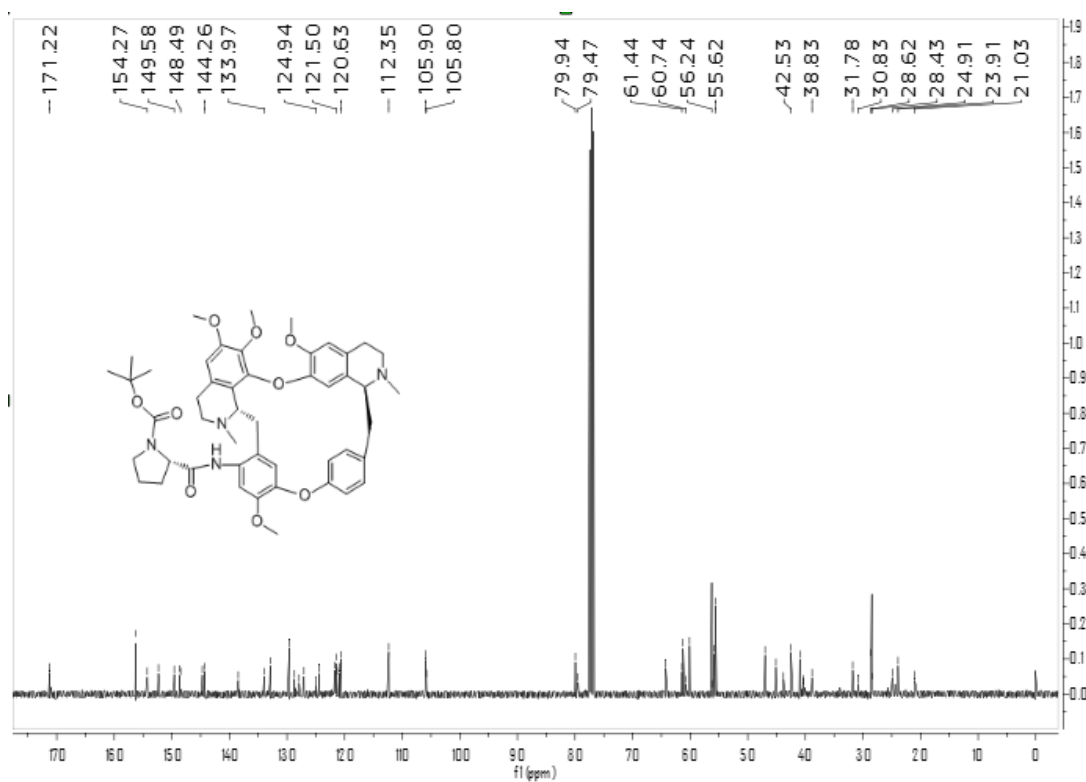

<sup>13</sup>C NMR spectrum of 7

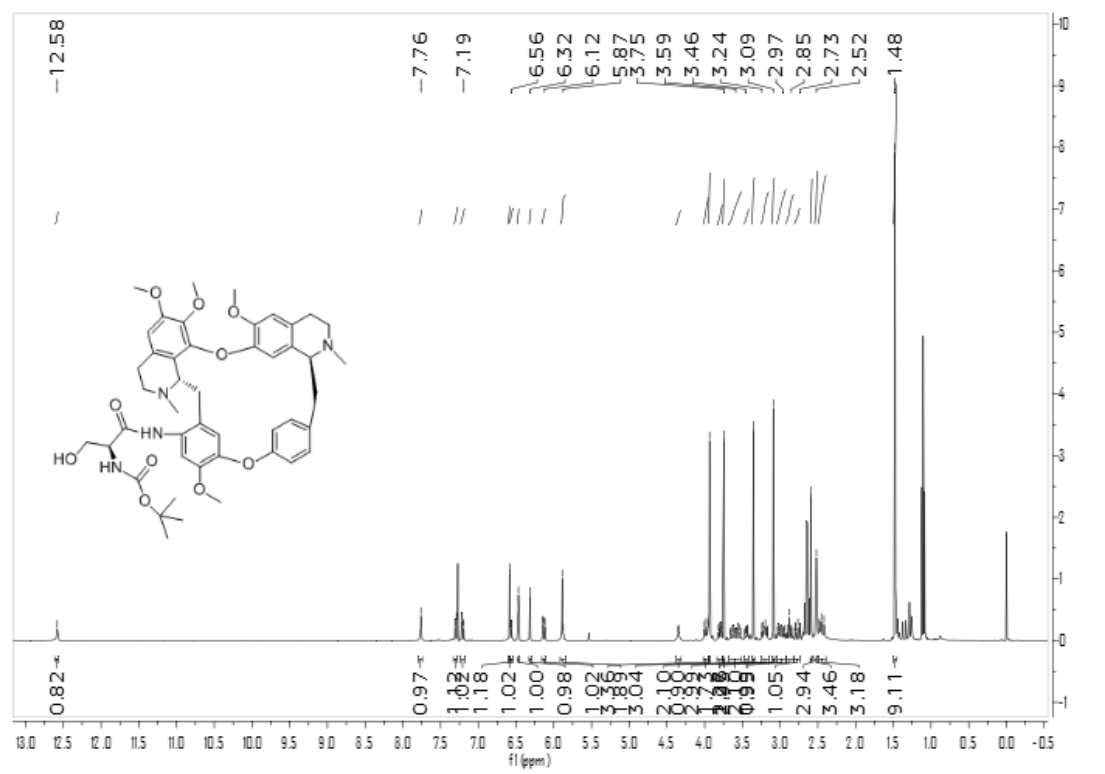

$^1\text{H}$  NMR spectrum of 8

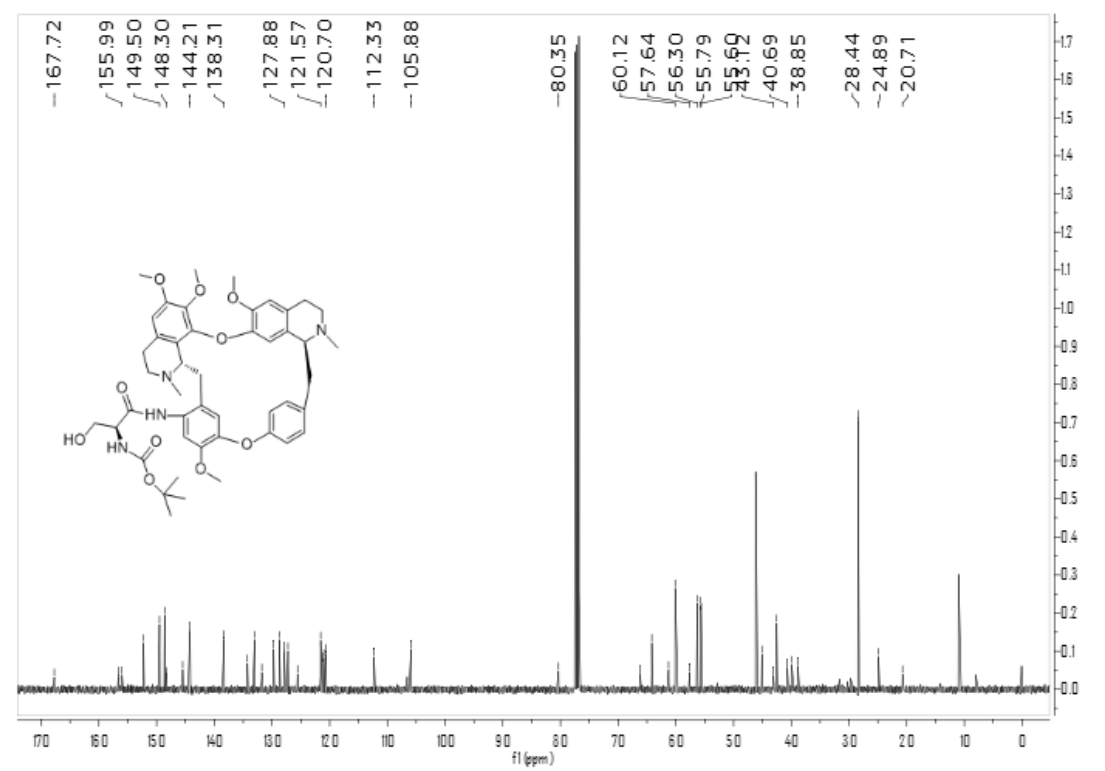

$^{13}\text{C}$  NMR spectrum of 8

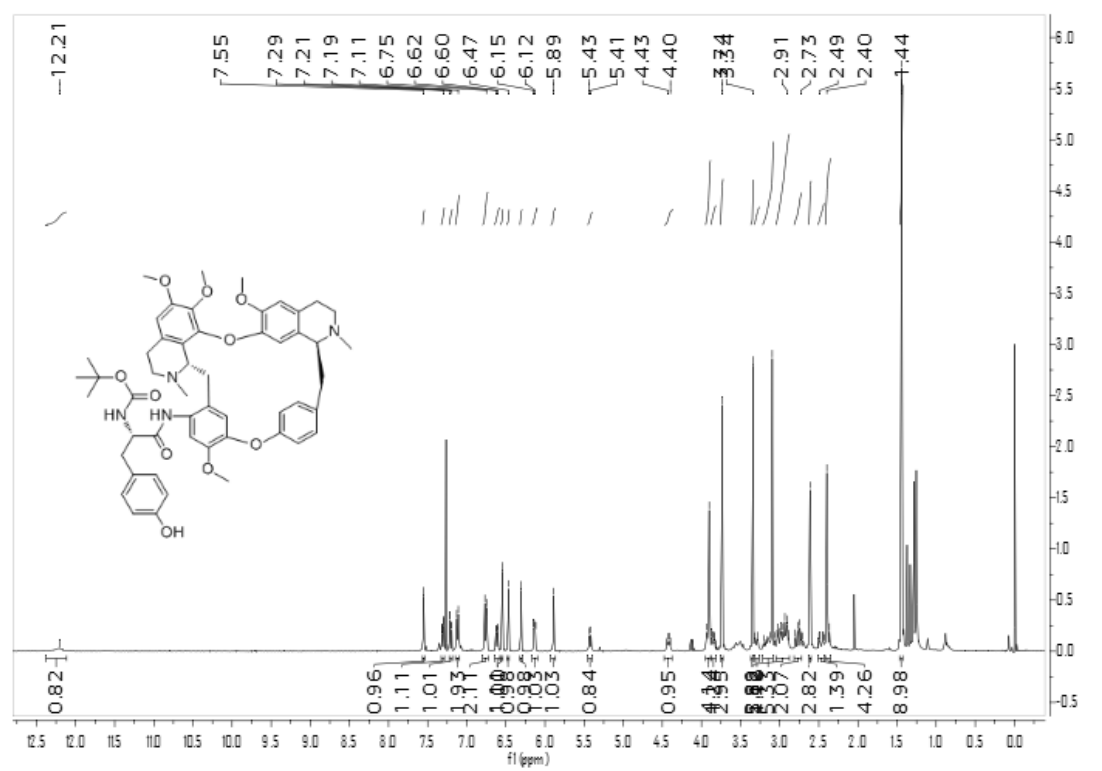

<sup>1</sup>H NMR spectrum of **11**

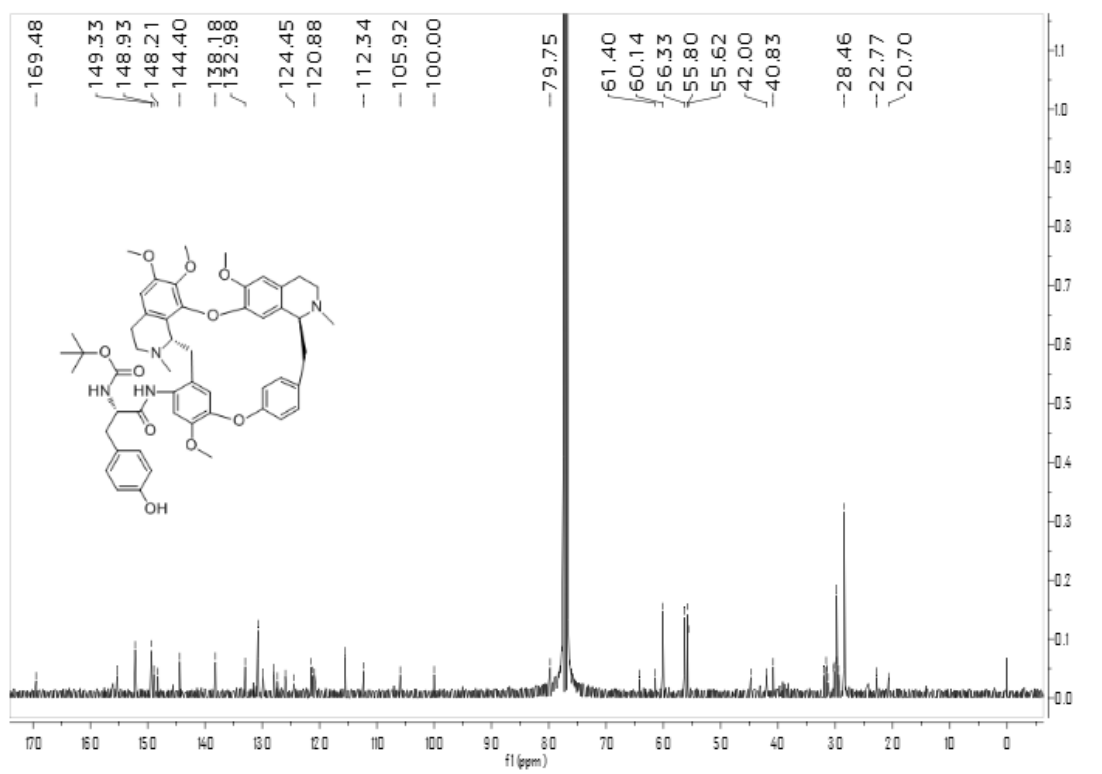

<sup>13</sup>C NMR spectrum of **11**

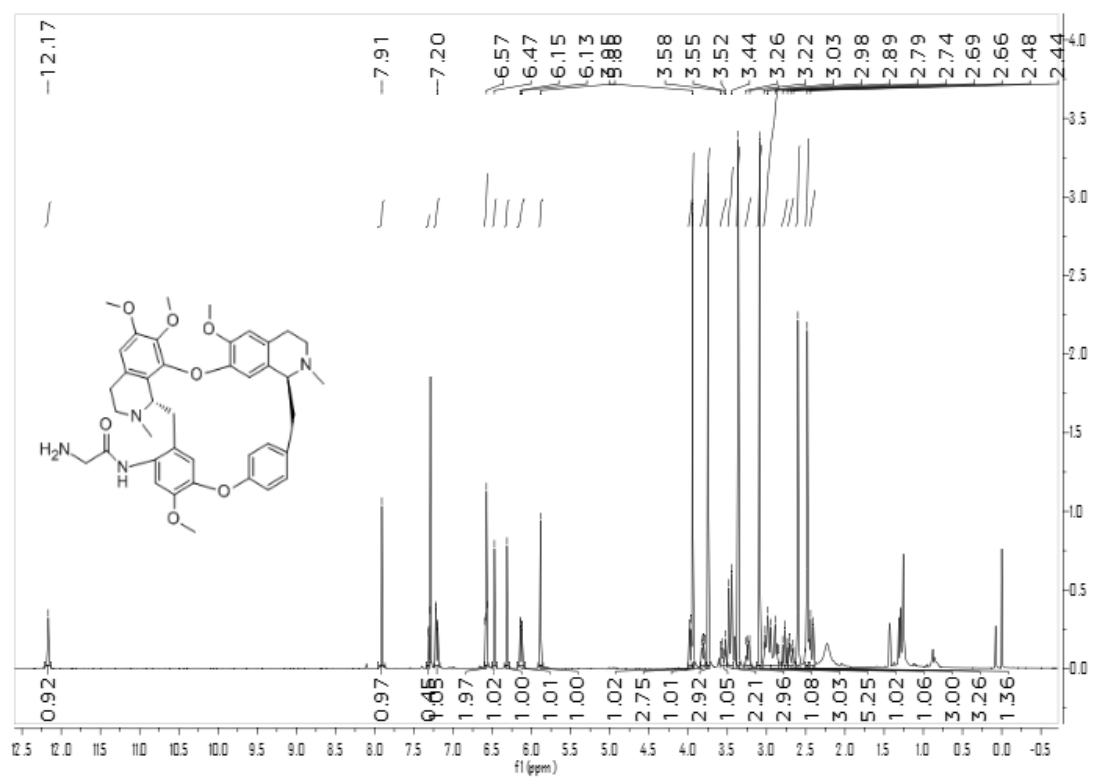

<sup>1</sup>H NMR spectrum of 12

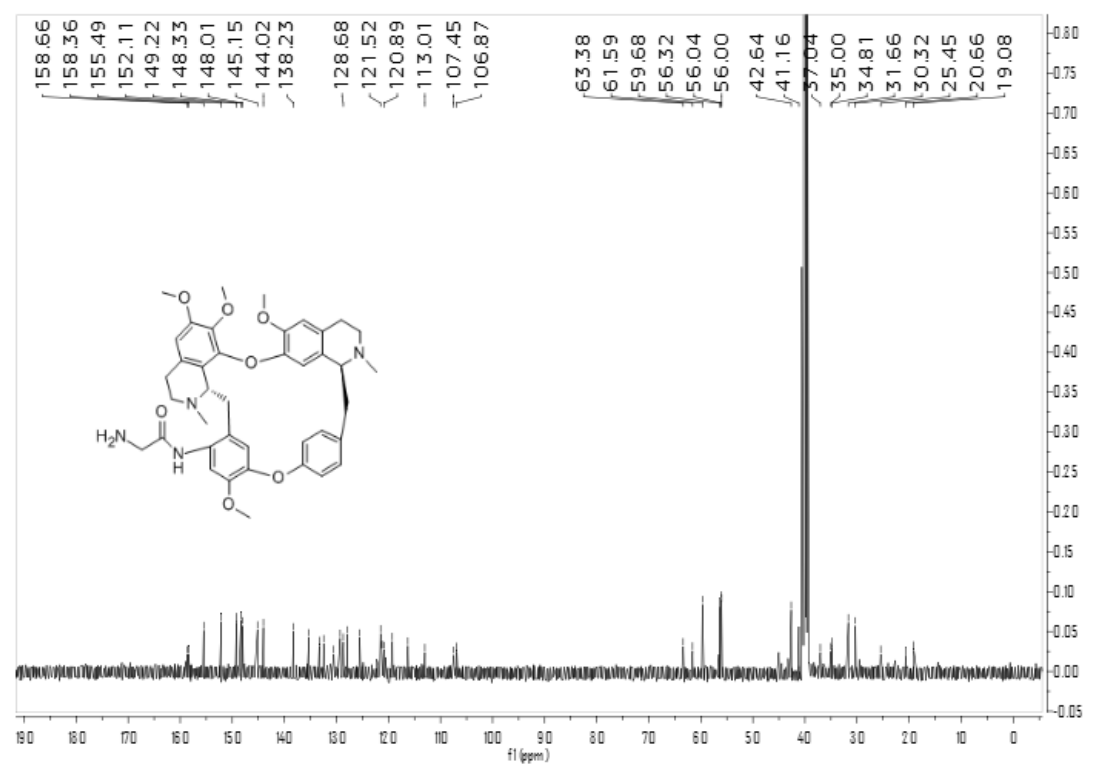

<sup>13</sup>C NMR spectrum of 12

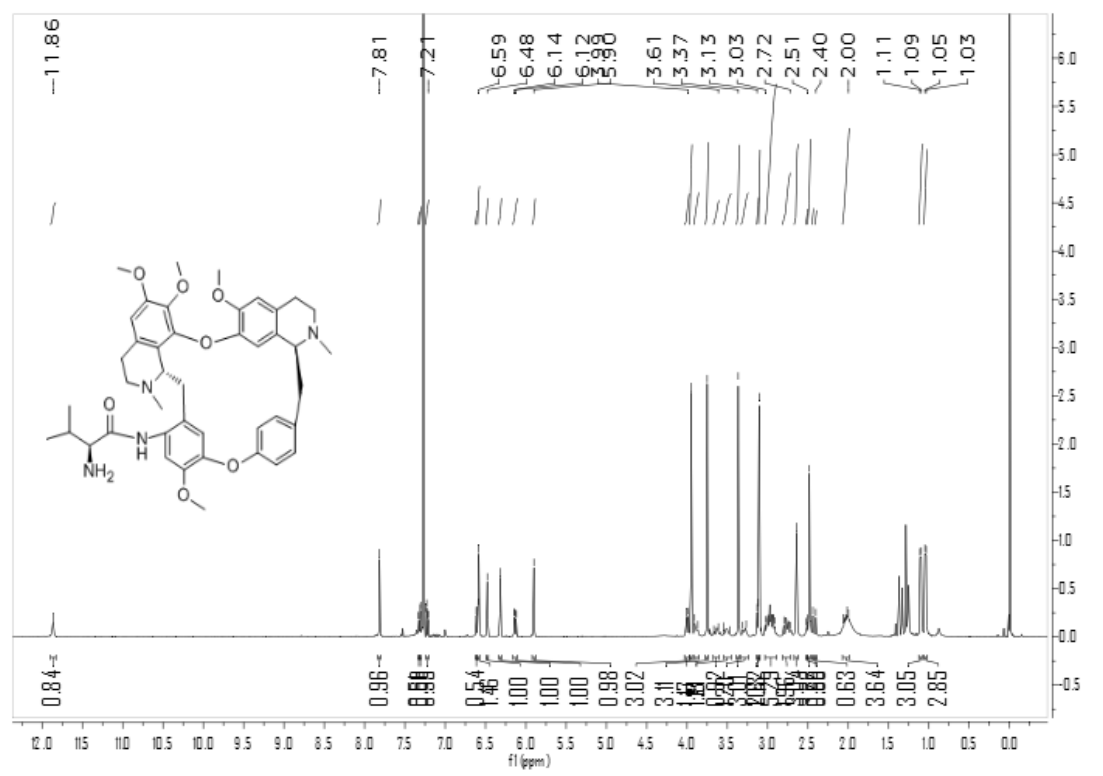

<sup>1</sup>H NMR spectrum of 14

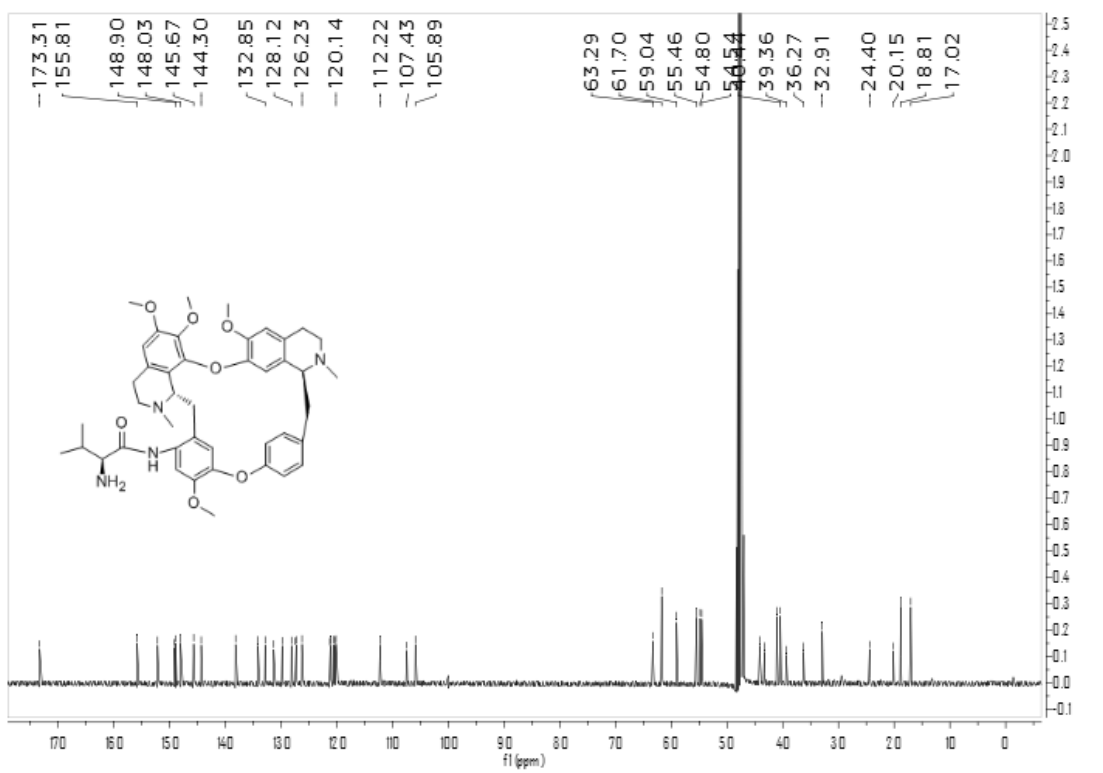

<sup>13</sup>C NMR spectrum of 14



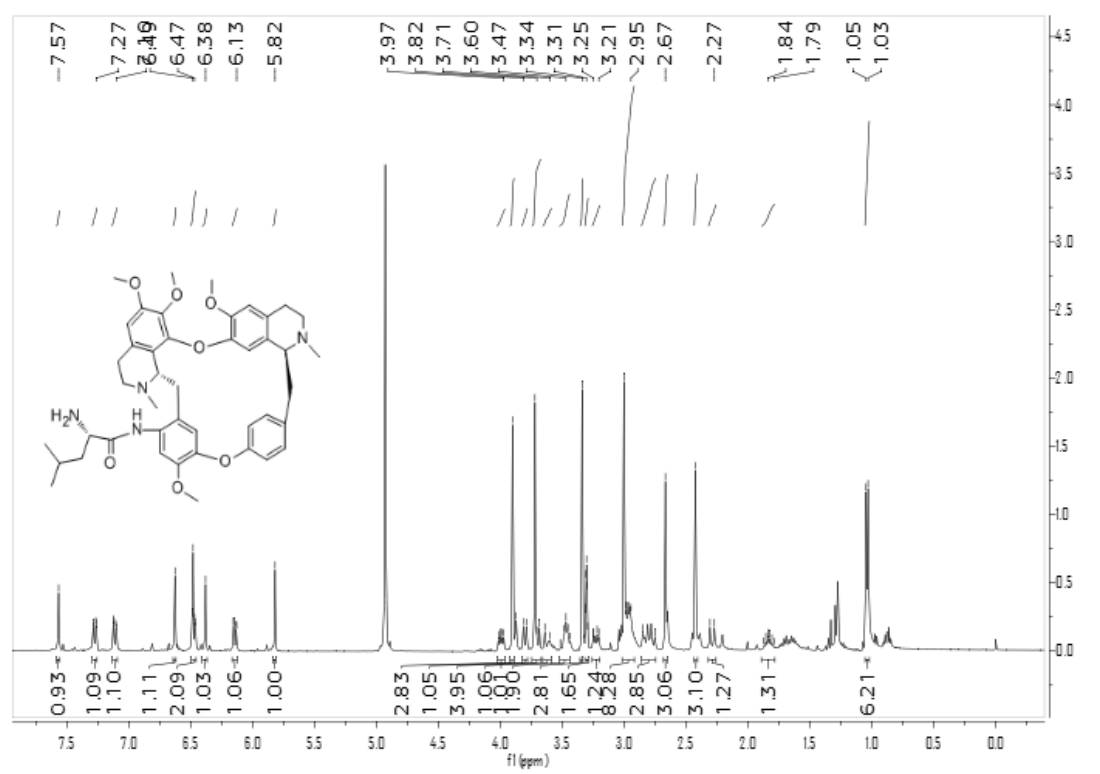

<sup>1</sup>H NMR spectrum of **15**

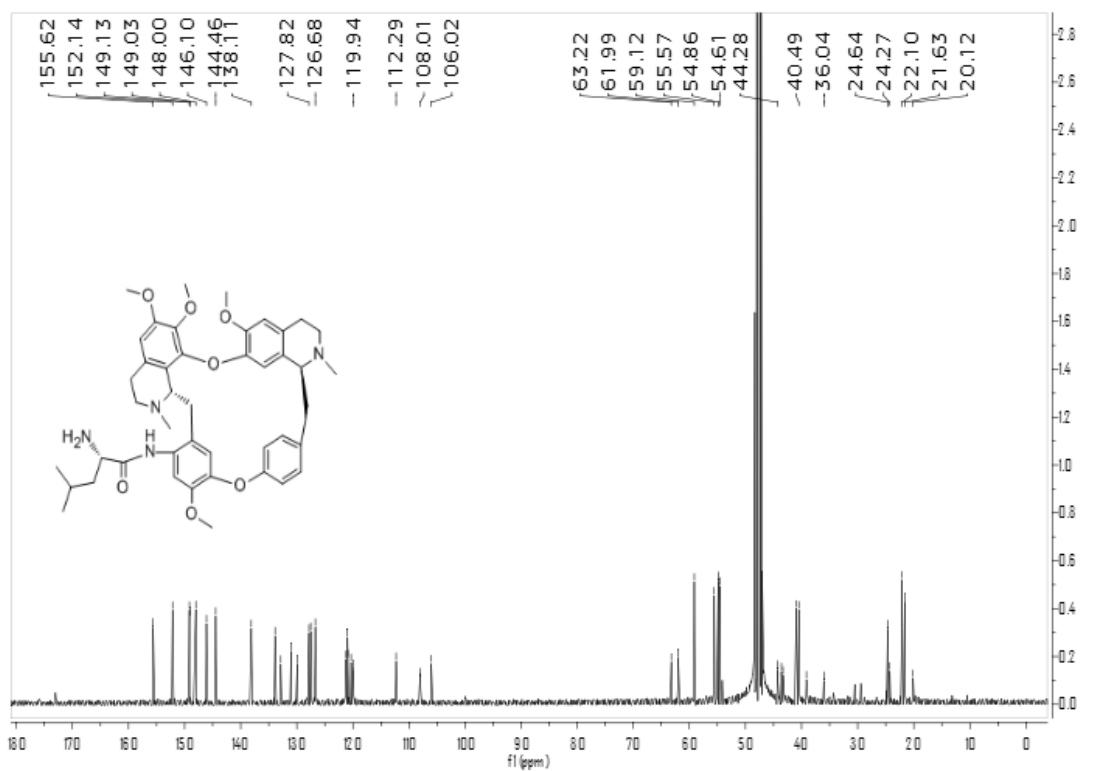

<sup>13</sup>C NMR spectrum of **15**

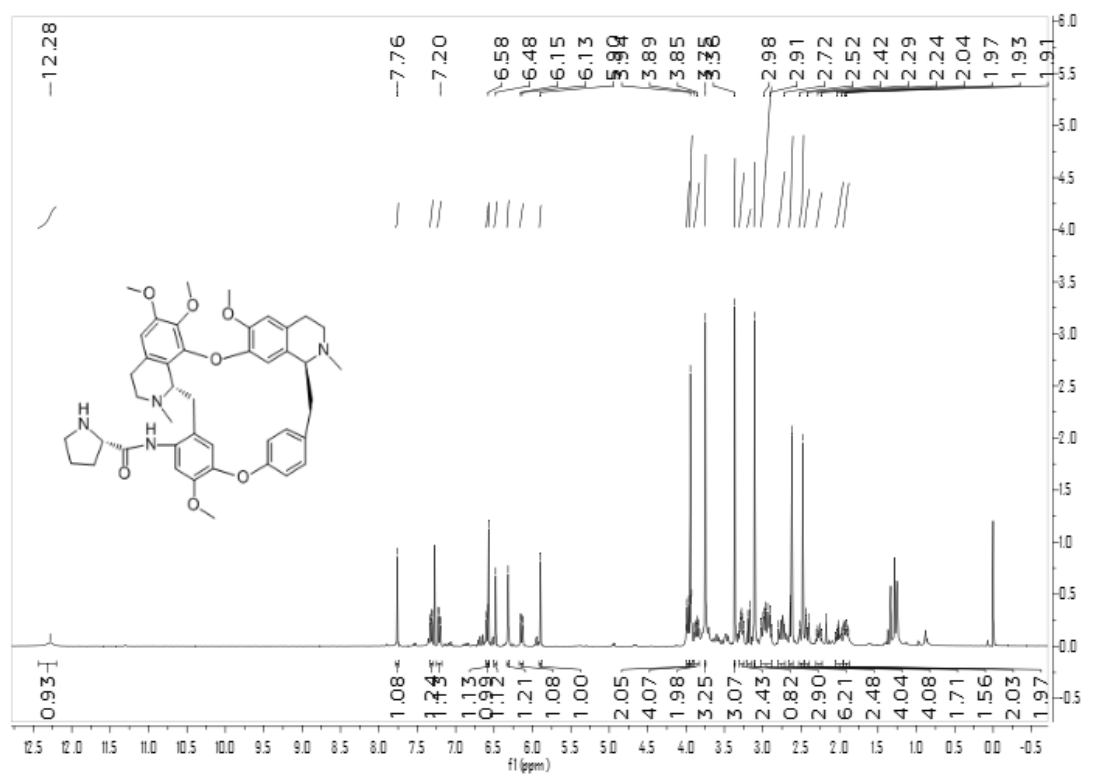

$^1\text{H}$  NMR spectrum of **16**

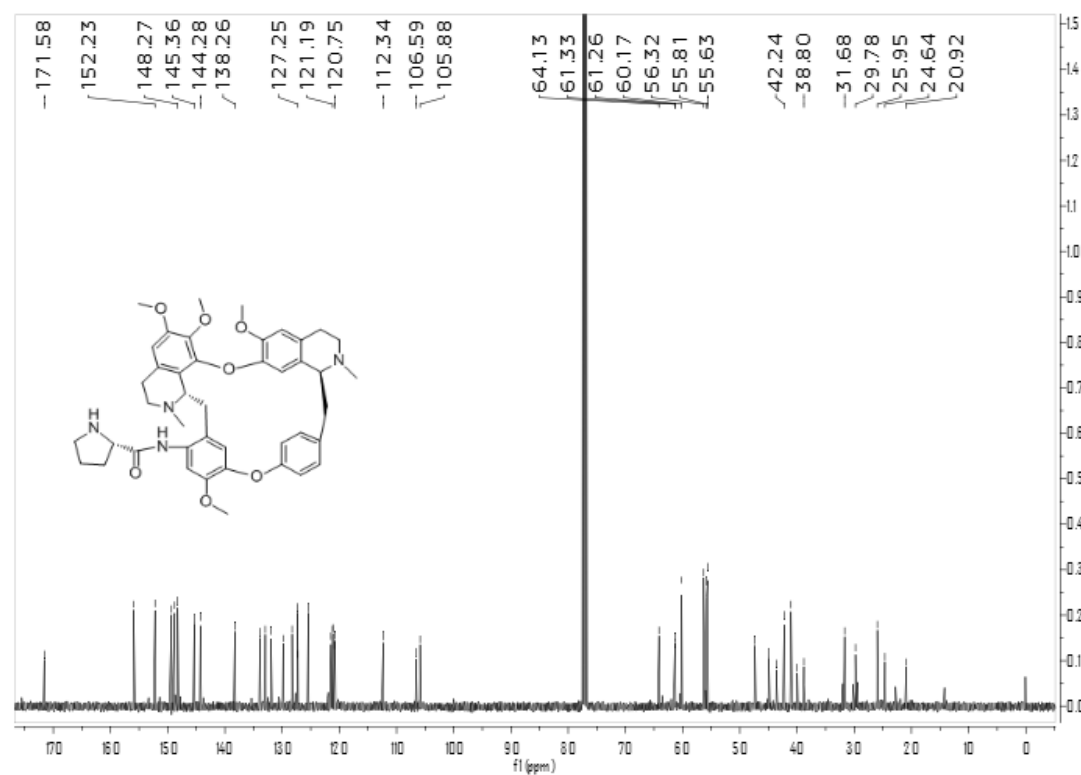

$^{13}\text{C}$  NMR spectrum of **16**

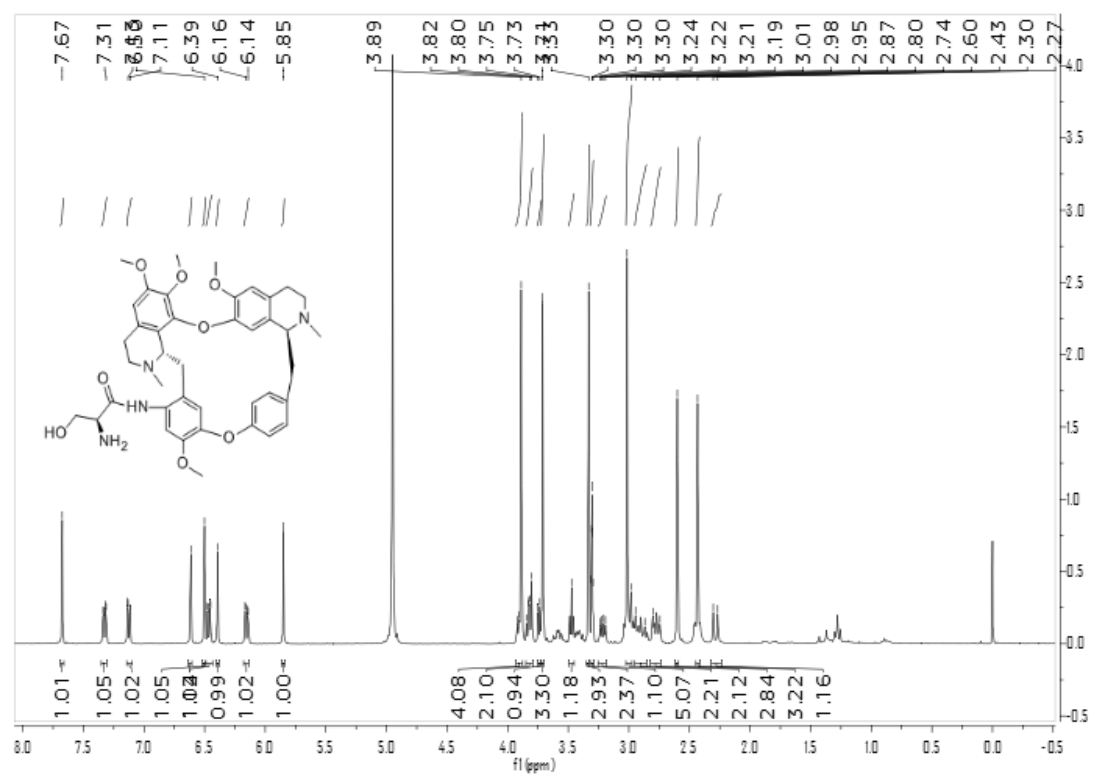

<sup>1</sup>H NMR spectrum of 17

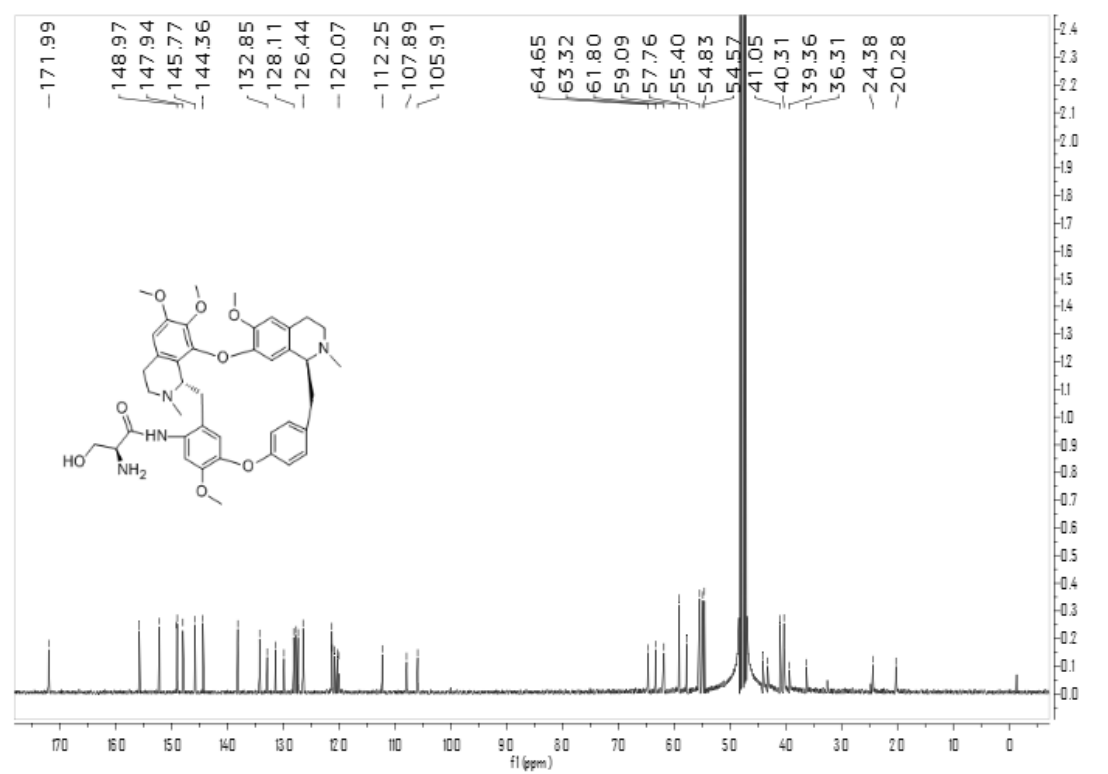

<sup>13</sup>C NMR spectrum of 17

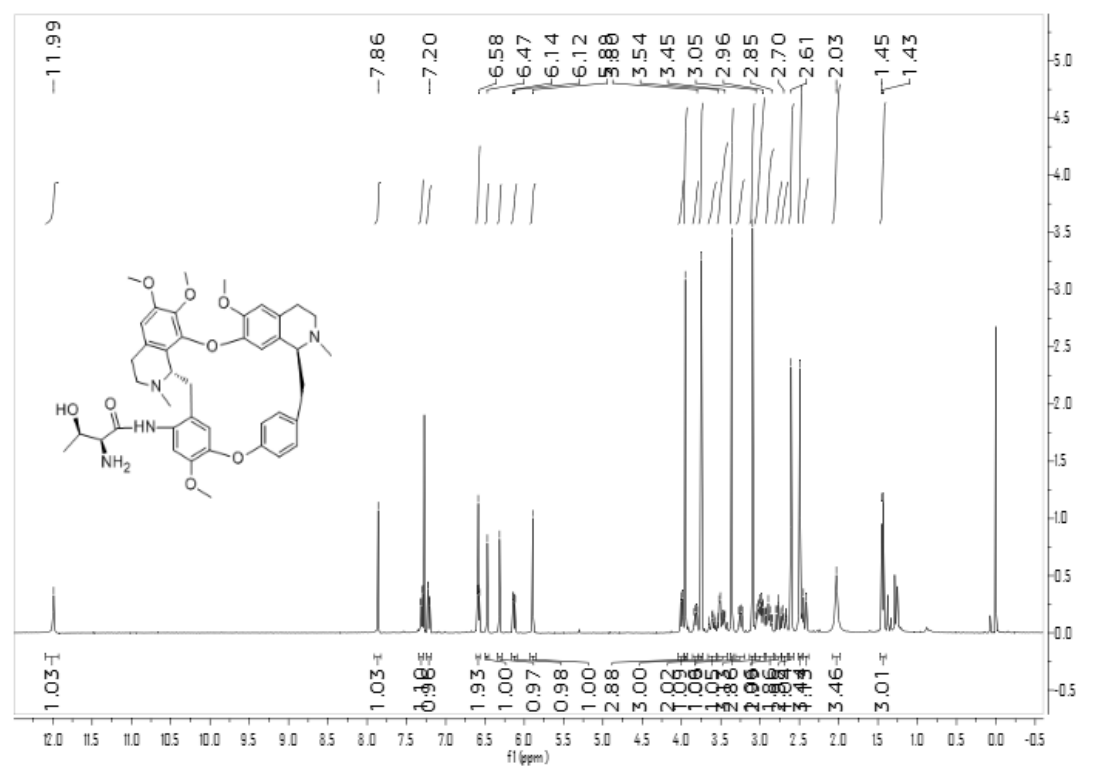

$^1\text{H}$  NMR spectrum of **18**

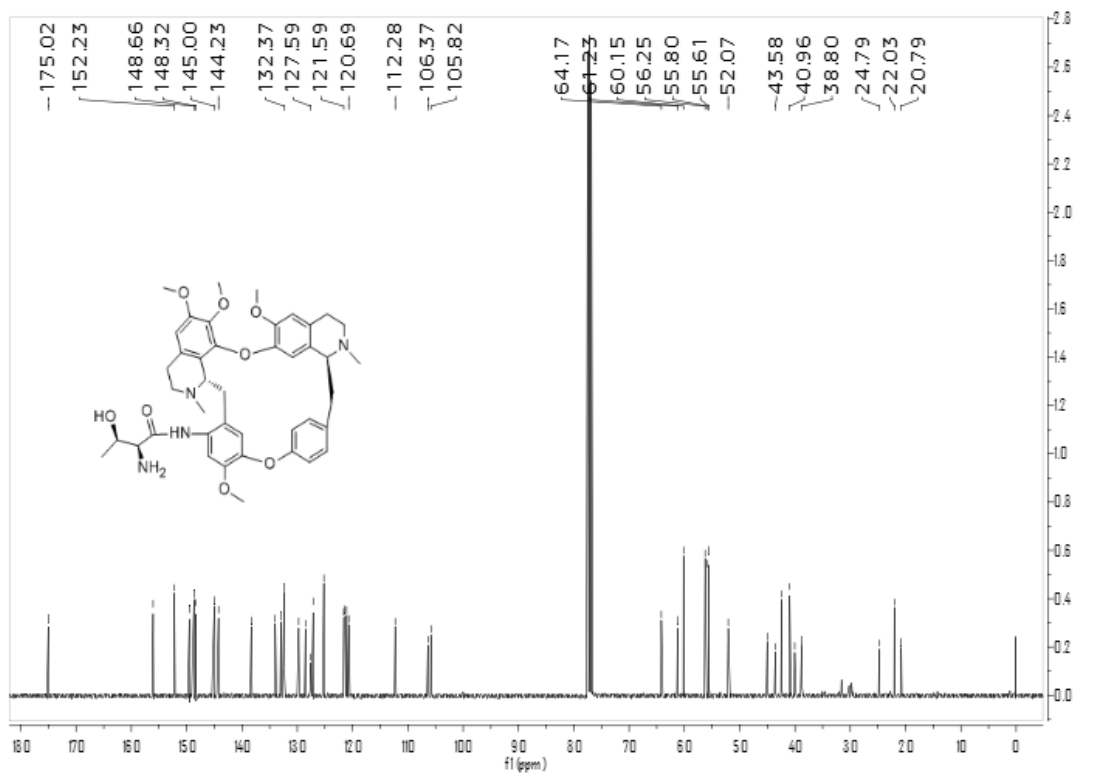

$^{13}\text{C}$  NMR spectrum of **18**

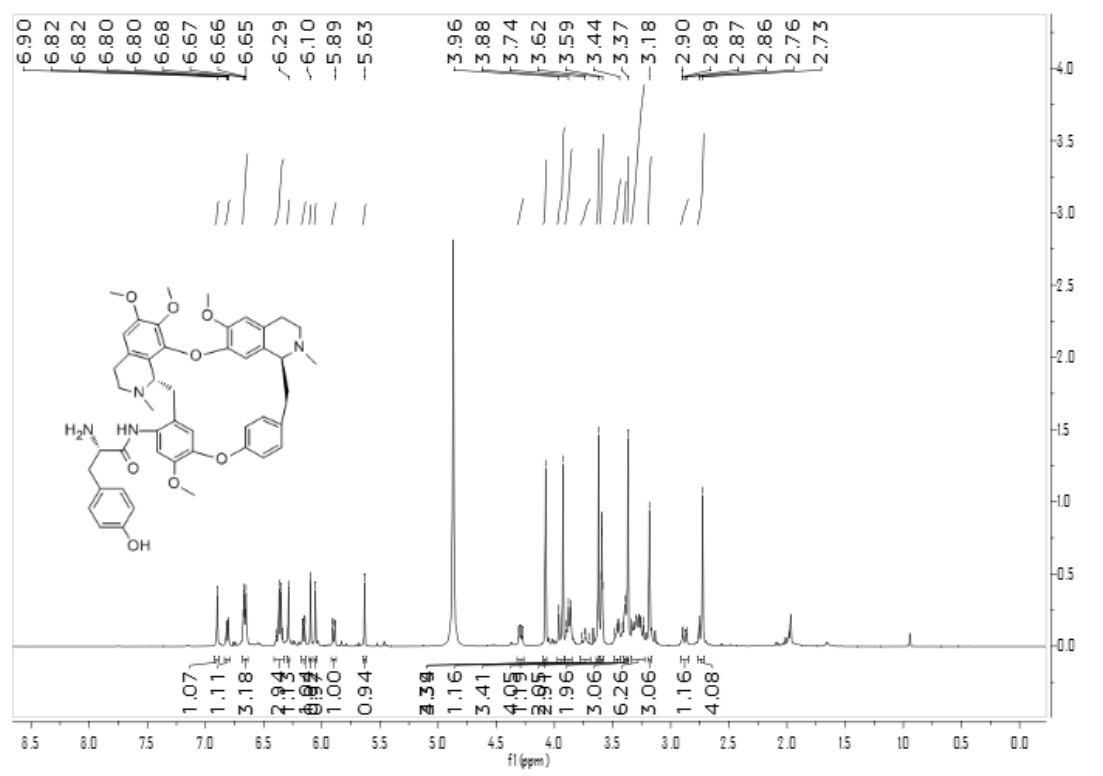

<sup>1</sup>H NMR spectrum of **20**

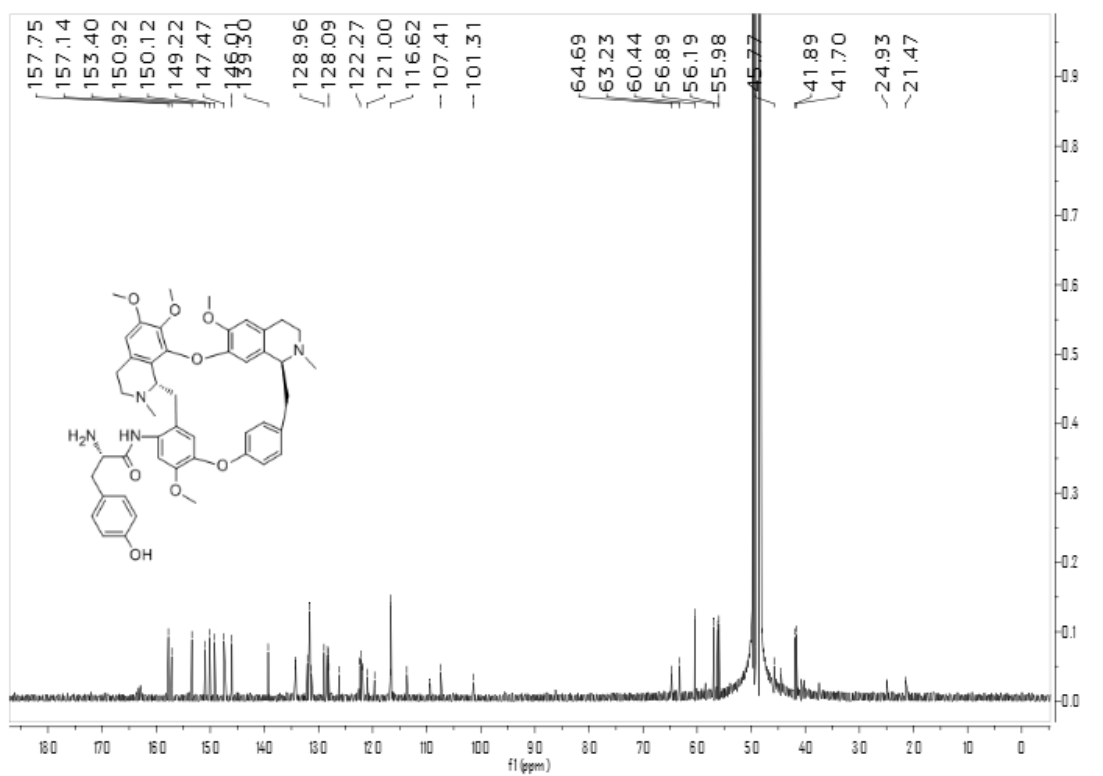

<sup>13</sup>C NMR spectrum of **20**

## IR spectra of compounds

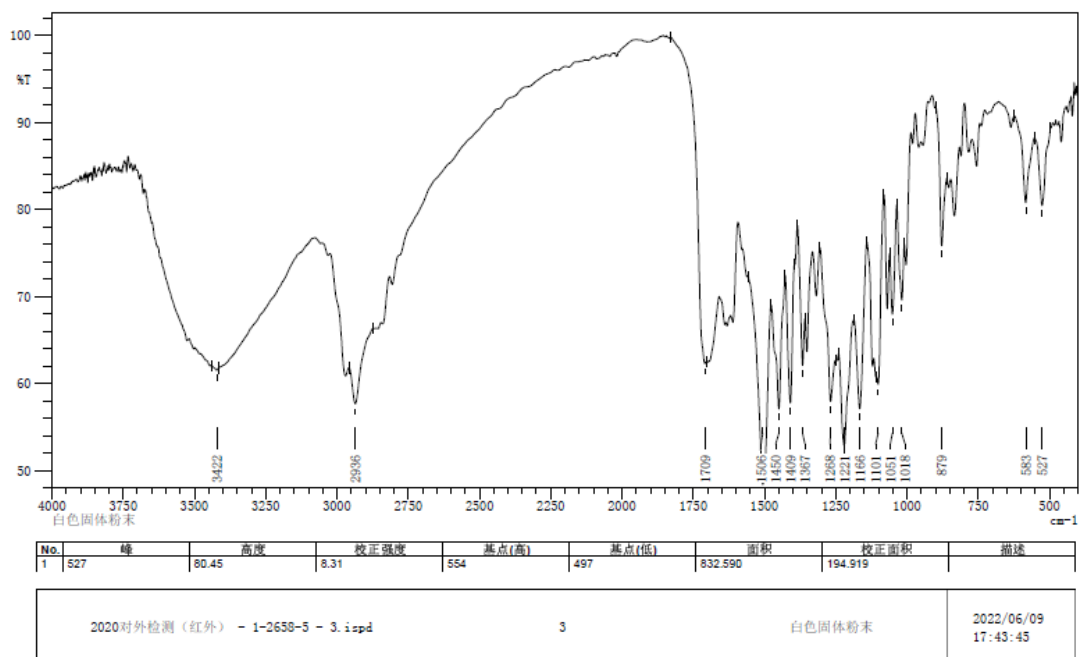

## IR spectrum of 3

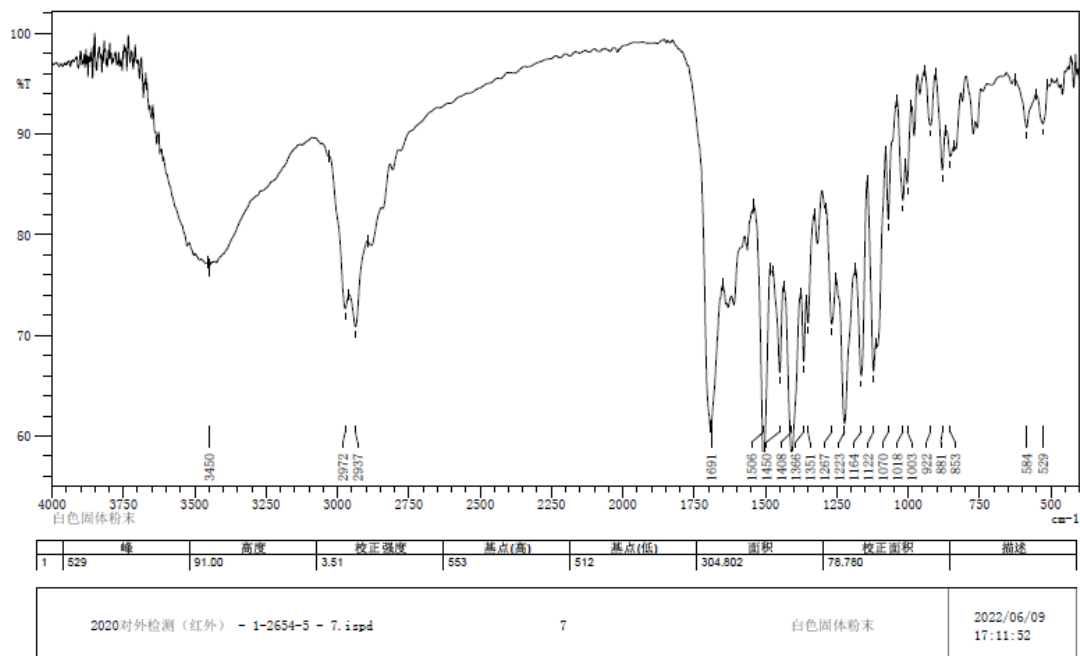

## IR spectrum of 7

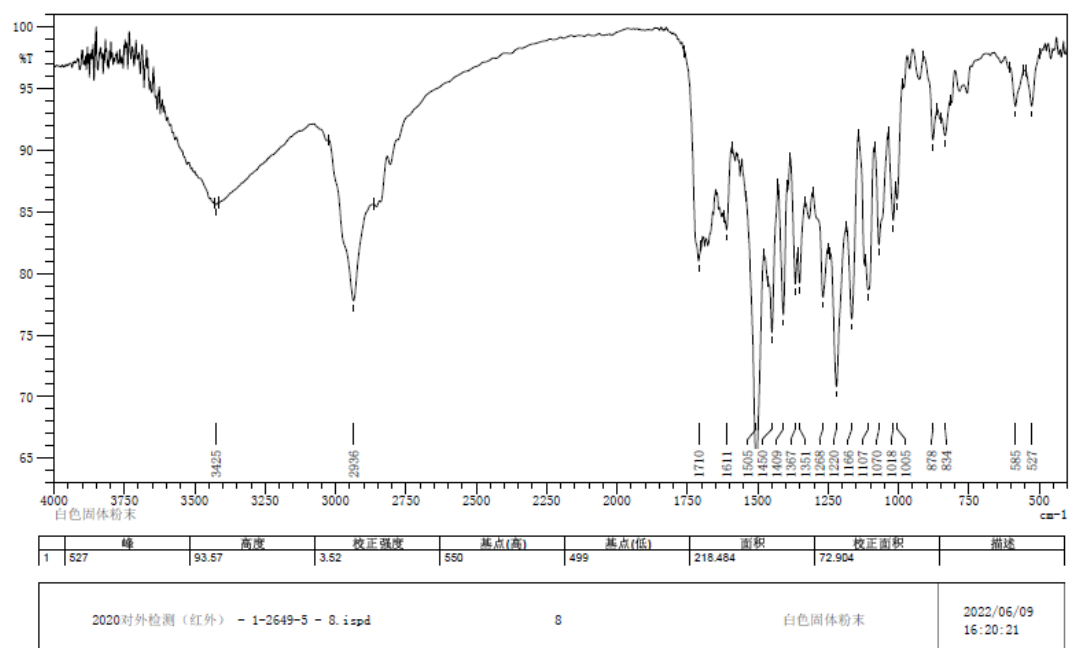

IR spectrum of 8

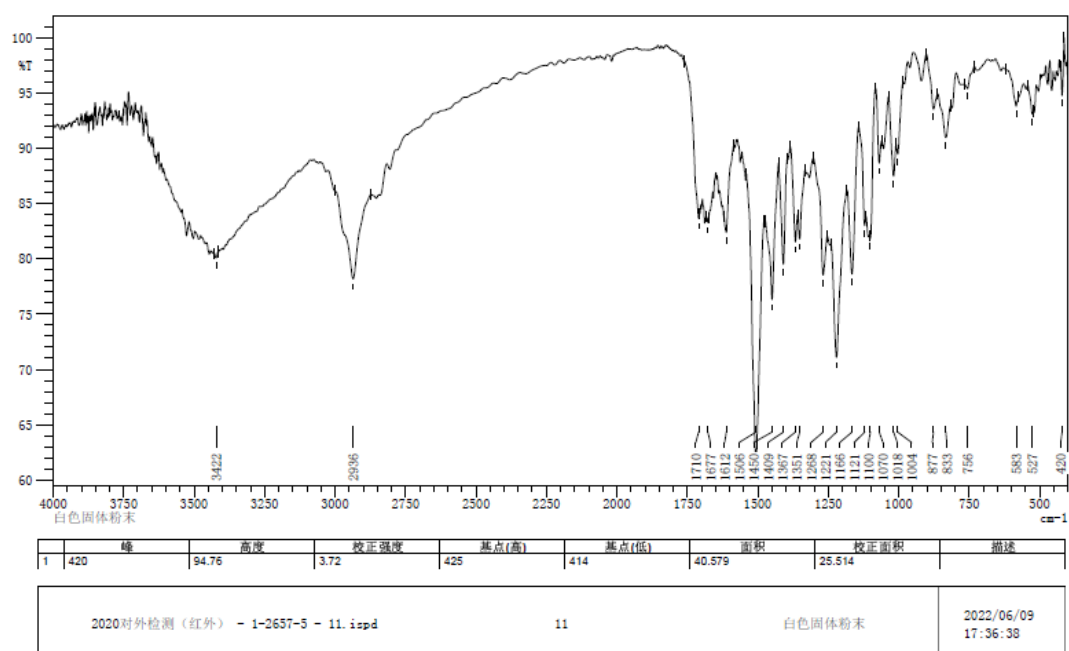

IR spectrum of 11

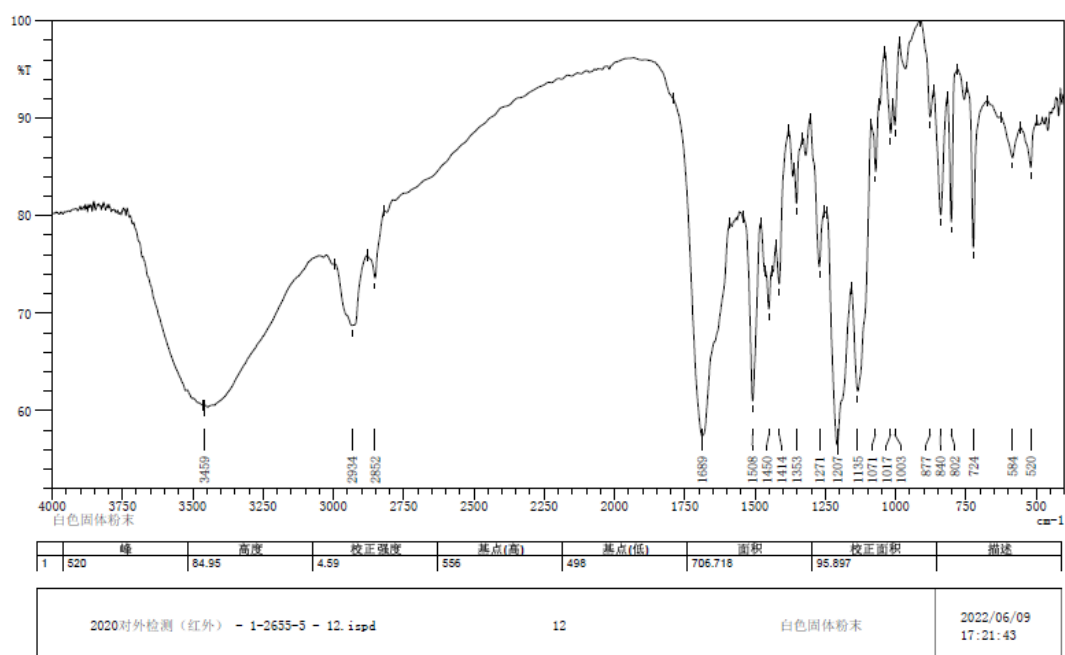

IR spectrum of 12

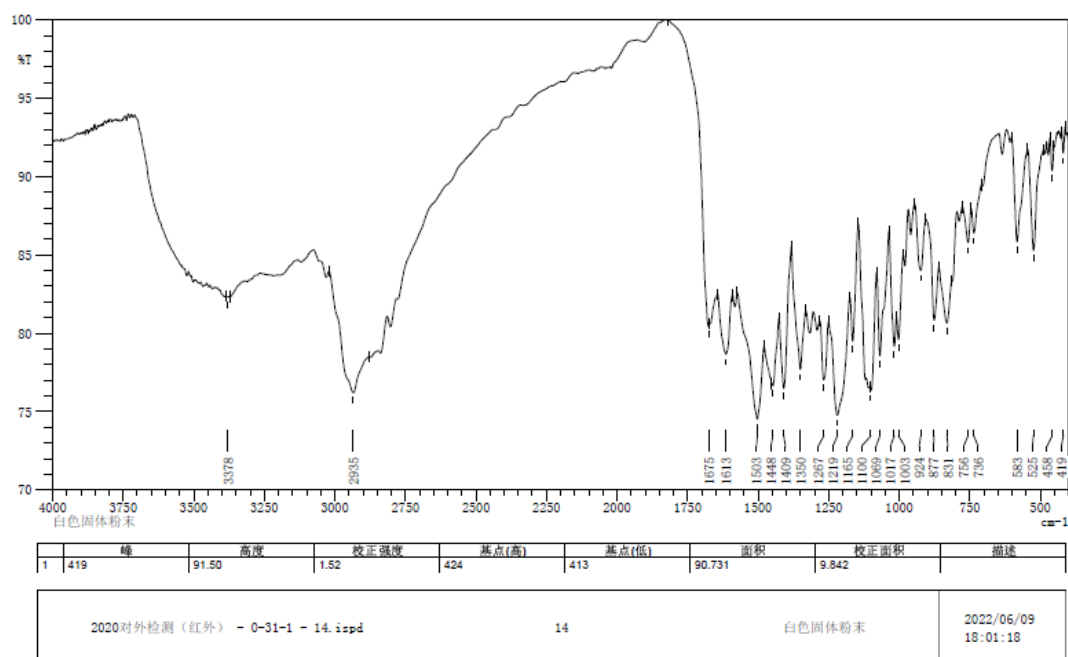

IR spectrum of 14



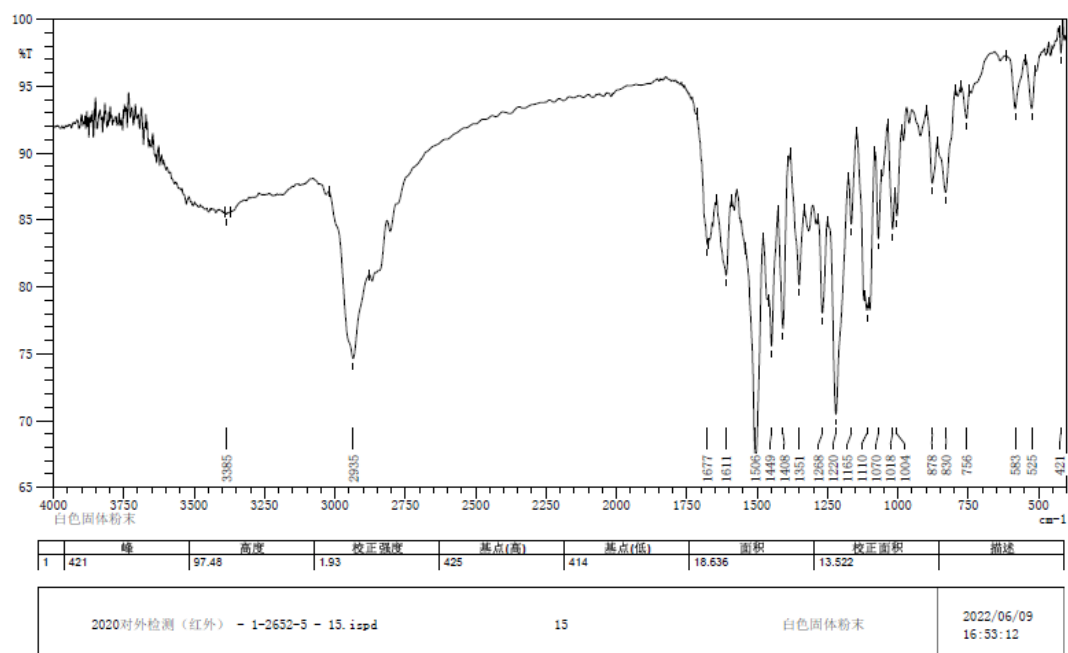

IR spectrum of 15

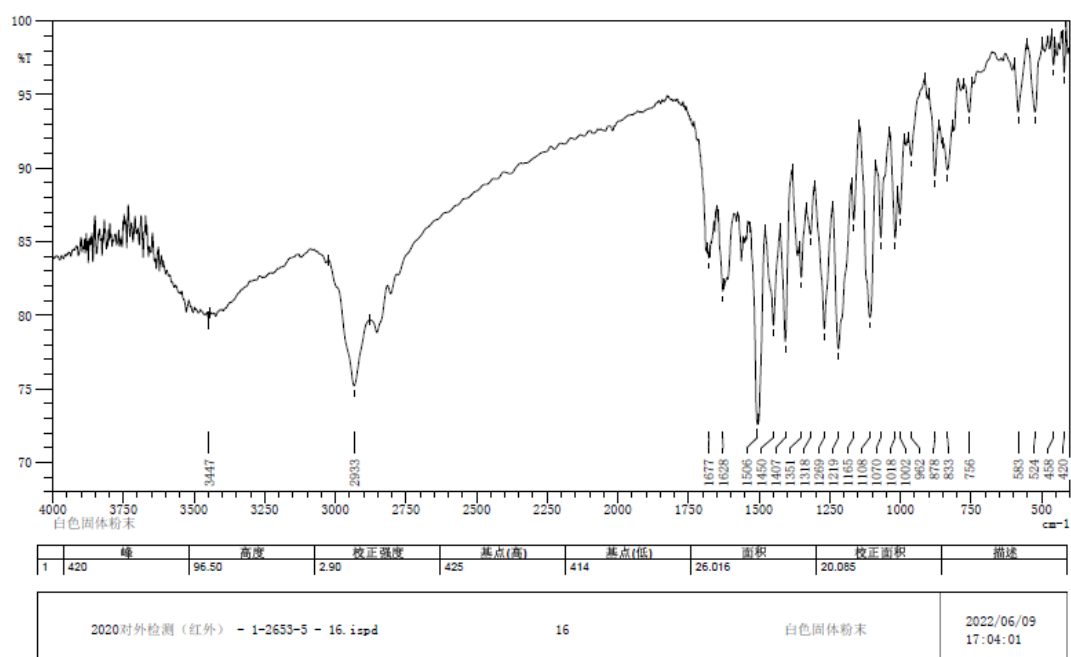

IR spectrum of 16

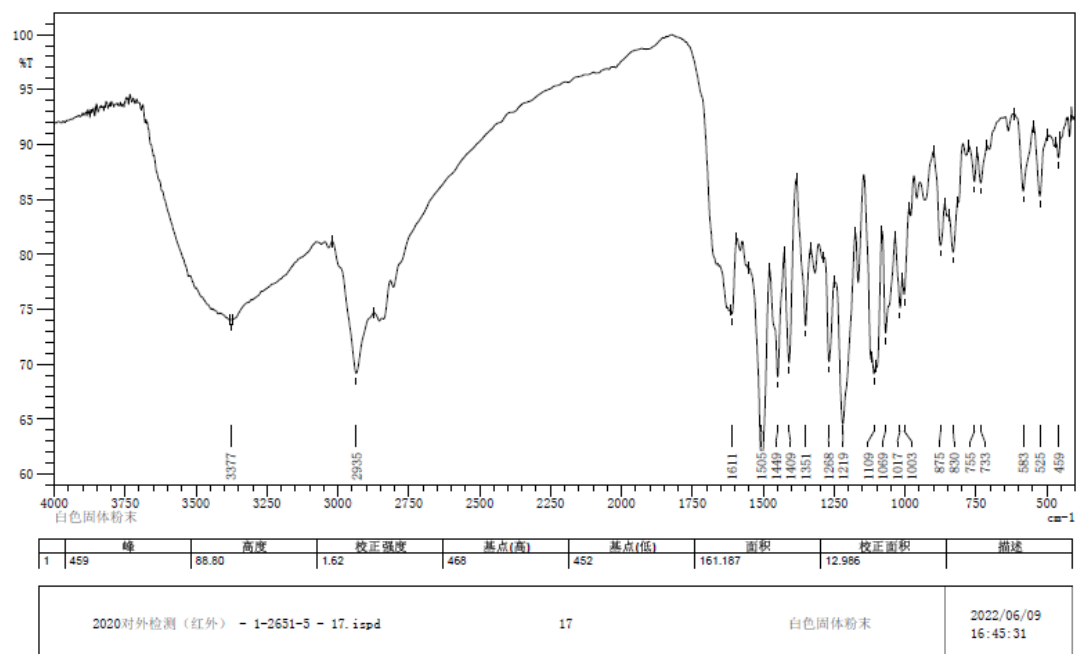

IR spectrum of 17

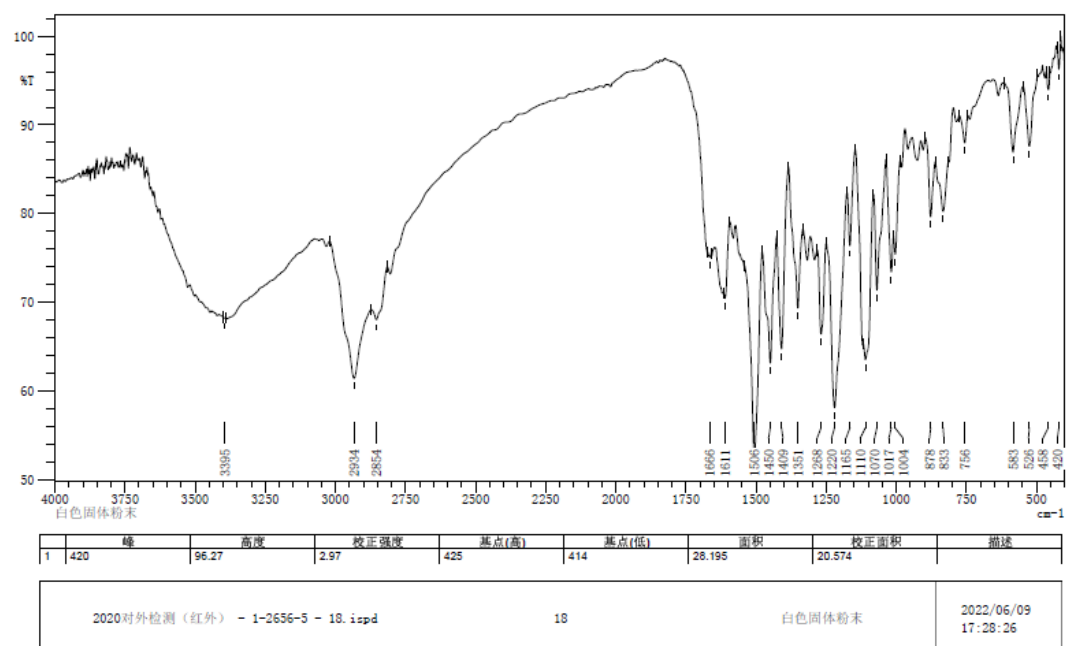

IR spectrum of 18

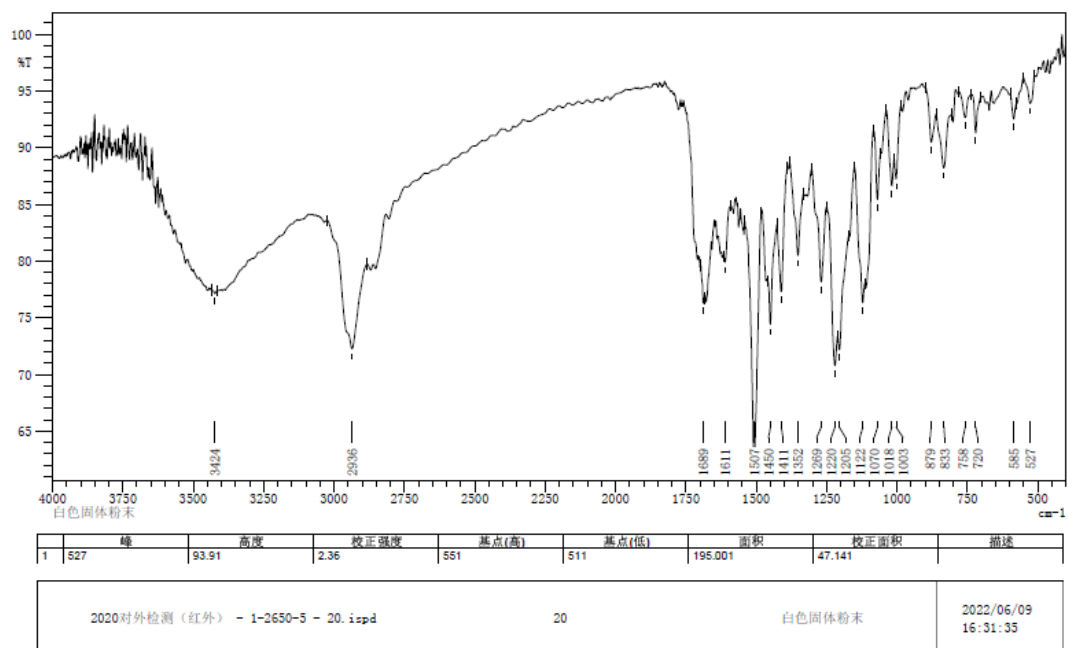

IR spectrum of **20**
